# Supplementary material
Source: publisher site journal article supplement (https://www.dovepress.com/article/424156)
Supplement: Supplementary file 1 [file get_supplementary_file.php]

Table S1：Sample list

| Species | Clinical | Contrived |
| --- | --- | --- |
| Candida glabrata | 4 | - |
| Candida albicans | 6 | - |
| Candida tropicalis | 5 | - |
| Candida parapsilosis | 3 | - |
| Aspergillus fumigatus | 2 | - |
| Penicillium marneffei | 1 | - |
| Candida krusei | - | 2 |
| Candida guilliermondii | - | 1 |
| Candida auris | - | 1 |
| Candida lusitaniae | - | 1 |
| Candida dubliniensis | - | 1 |
| Cryptococcus neoformans | - | 2 |
| Rhodotorula dairenensis | - | 1 |
| E.coli | 4 | - |
| Klebsiella pneumoniae | 5 | - |
| Staphylococcus aureus | 2 | - |
| Pseudomonas aeruginosa | 1 | - |
| Acinetobacter baumannii | 1 | - |


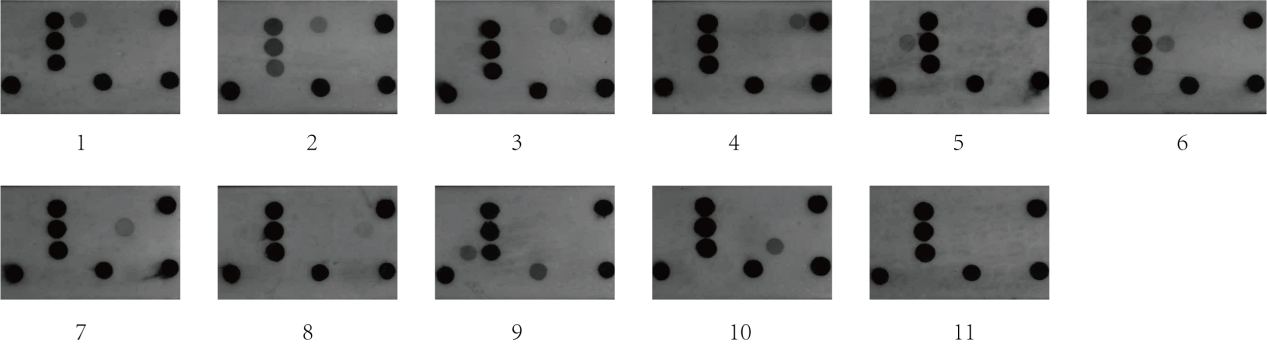


Figure S1：the test results of each bacteria at 103cfu/ml


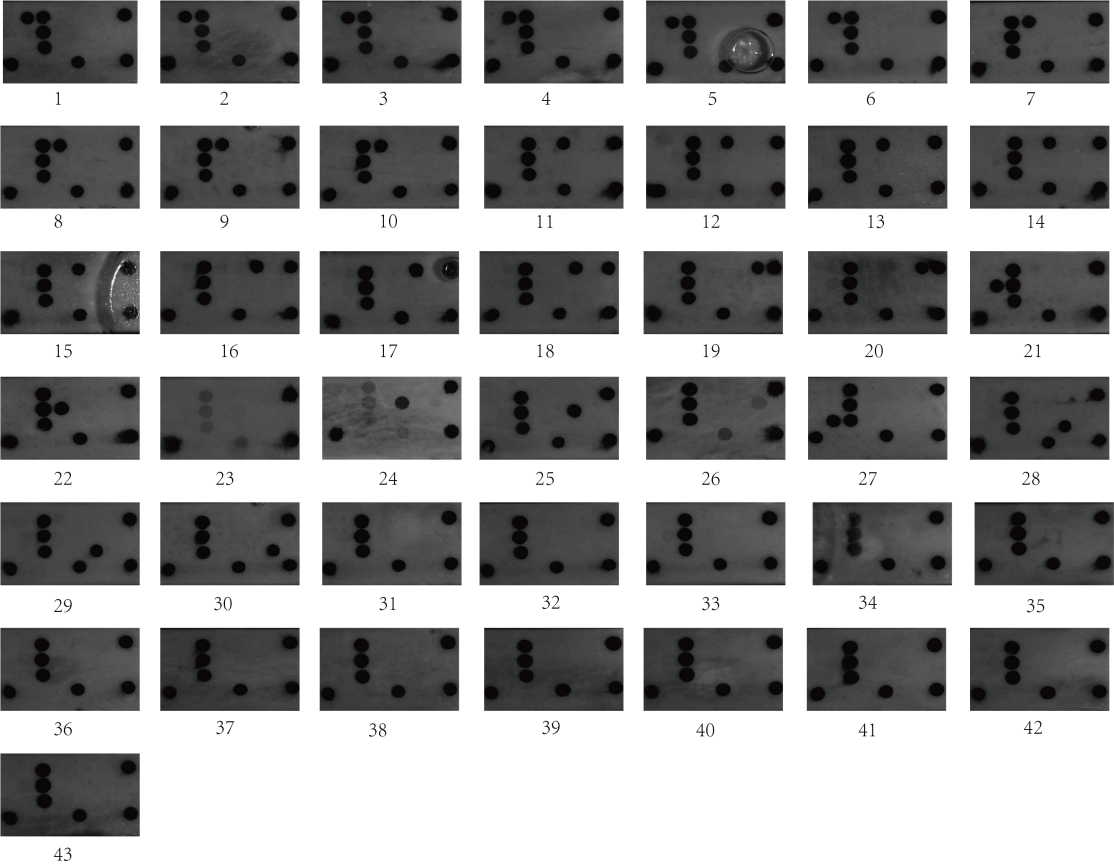


Figure S2:Forty-three samples were tested for raw data；1-6：Candida albicans；7-10：Candida glabrata；11-15：Candida tropicalis；16-18：Candida parapsilosis；19-20：Candida krusei；21：Candida guilliermondii；22：Candida auris；23-24：Aspergillus fumigatus；25：Candida lusitaniae；26：Penicillium marneffei；27：Candida dubliniensis；28-29：Cryptococcus neoformans；30：Rhodotorula dairenensis；31-34：E.coli；35-39：Klebsiella pneumoniae；40-41：Staphylococcus aureus；42:Pseudomonas aeruginosa；43：Acinetobacter baumannii；


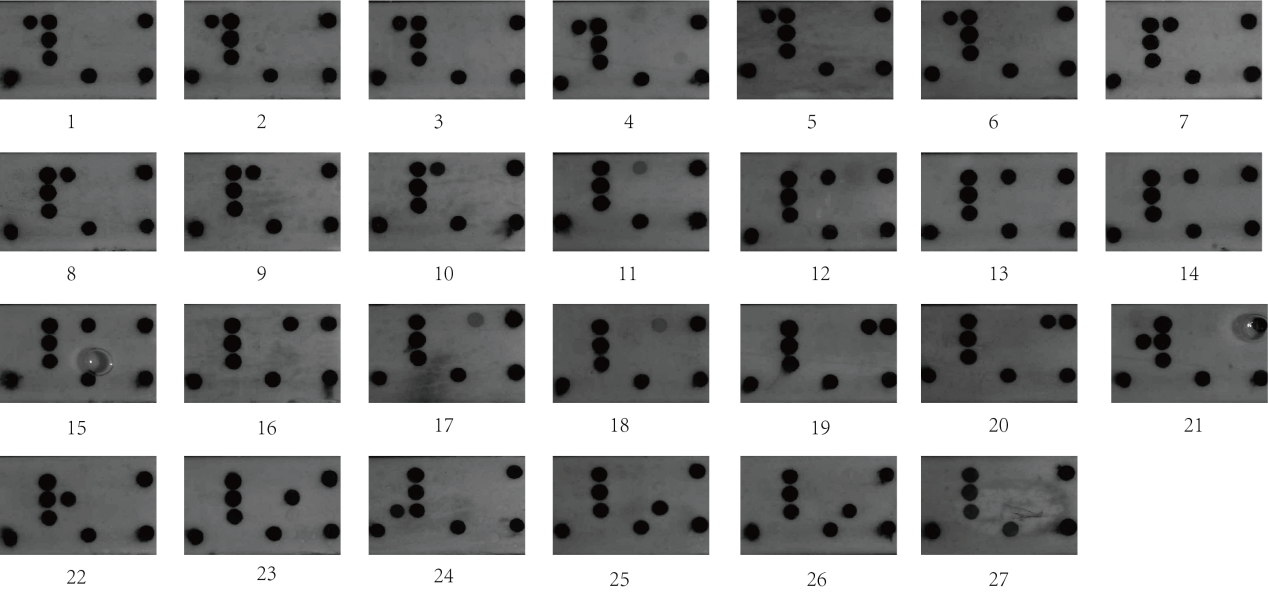


Figure S3:Microfluidic chip detection results during 24h blood culture period1-6：Candida albicans；7-10：Candida glabrata；11-15：Candida tropicalis；16-18：Candida parapsilosis；19-20：Candida krusei；21：Candida guilliermondii；22：Candida auris；23：Candida lusitaniae；24：Candida dubliniensis；25-26：Cryptococcus neoformans；27：Rhodotorula dairenensis


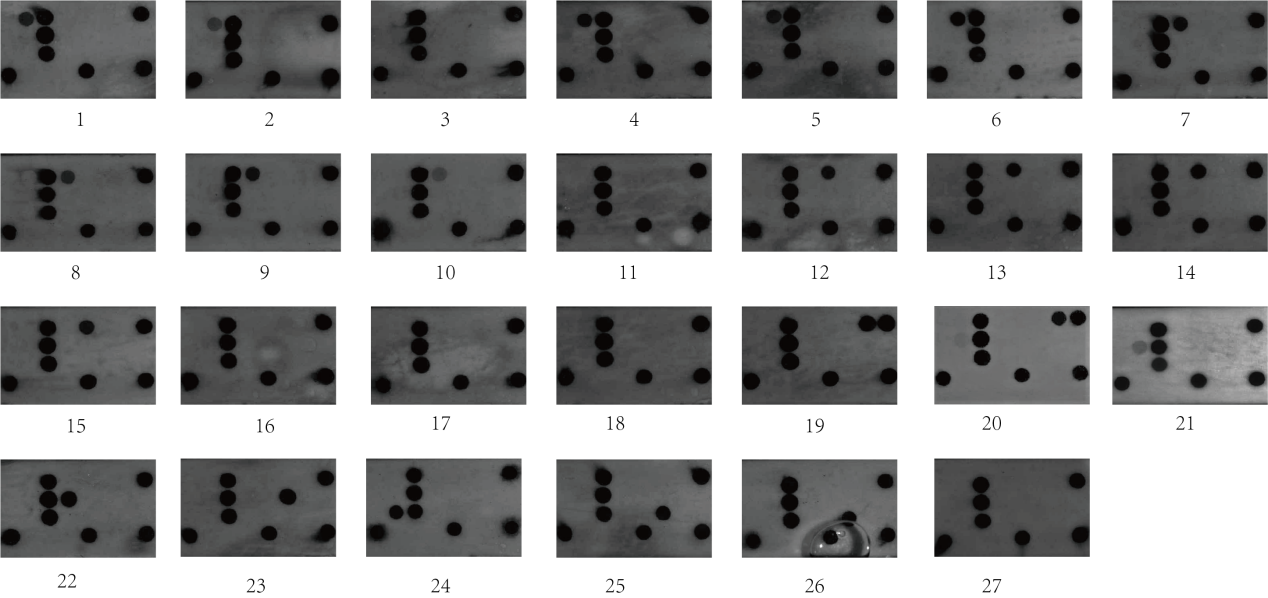


Figure S4:Microfluidic chip detection results during 16h blood culture period1-6：Candida albicans；7-10：Candida glabrata；11-15：Candida tropicalis；16-18：Candida parapsilosis；19-20：Candida krusei；21：Candida guilliermondii；22：Candida auris；23：Candida lusitaniae；24：Candida dubliniensis；25-26：Cryptococcus neoformans；27：Rhodotorula dairenensis


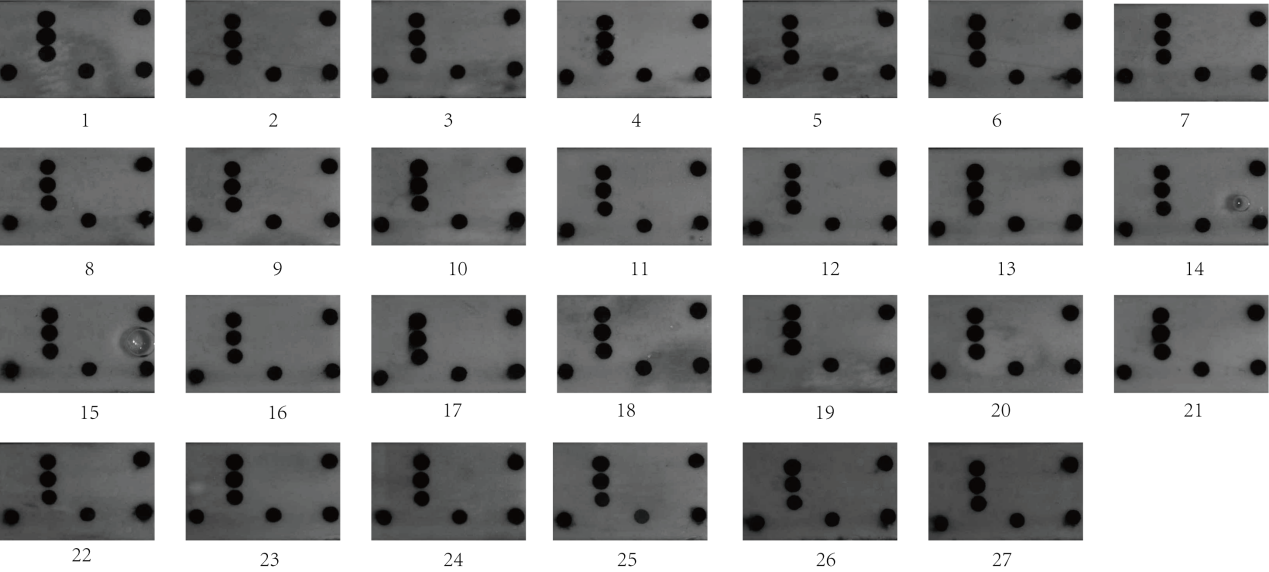


Figure S5:Microfluidic chip detection results during 8h blood culture period1-6：Candida albicans；7-10：Candida glabrata；11-15：Candida tropicalis；16-18：Candida parapsilosis；19-20：Candida krusei；21：Candida guilliermondii；22：Candida auris；23：Candida lusitaniae；24：Candida dubliniensis；25-26：Cryptococcus neoformans；27：Rhodotorula dairenensis
